# Supplementary material for: Characterization of the genome fromGeobacter anodireducens, a strain with enhanced current production in bioelectrochemical systems
Source: Royal Society of Chemistry journal article supplement (doi:10.1039/c9ra02343g), 2019-01-01
Supplement: c9ra02343g1.xlsx [file c9ra02343g1.xlsx]

## Sheet: Suppl Table S2A
Supplementary Table S2A. Genes coding for putative c-type cytochromes in G . Anodireducens and their homologs in other Geobacter species
Locus ID	# hemes	transmembrane helices	signal peptide?	location	Homolog in GSS01	Homolog in PCA	Homolog in GS-15
Ga0133348_11607	3	0	no	Unknown	Ga0077628_11115	GSU0533	no hit
Ga0133348_111777	4	0	no	Periplasmic	Ga0077628_111186	GSU1787	Gmet_1868
Ga0133348_111778	8	0	no	Unknown	Ga0077628_111187	GSU1786	Gmet_1867
Ga0133348_111806	3	0	no	Extracellular	Ga0077628_111213	GSU1761	no hit
Ga0133348_111808	2	0	no	Periplasmic	Ga0077628_111215	GSU1760	Gmet_1846
Ga0133348_111952	2	0	no	Unknown	Ga0077628_111430	GSU1648	Gmet_1924
Ga0133348_112060	2	0	no	Periplasmic	Ga0077628_111516	GSU1538	Gmet_1210
Ga0133348_11667	11	0	no	Extracellular	Ga0077628_11158	GSU0592	Gmet_2930
Ga0133348_11669	3	0	no	Unknown	Ga0077628_11160	GSU0594	Gmet_2928
Ga0133348_112269	8	0	no	Unknown	Ga0077628_111732	GSU1334	Gmet_0930
Ga0133348_112315	1	0	no	Unknown	Ga0077628_111777	GSU1284	Gmet_2432
Ga0133348_11688	2	0	no	Periplasmic	Ga0077628_11179, Ga0077628_113309,	GSU0612	Gmet_2902
Ga0133348_11691	11	0	no	Periplasmic	Ga0077628_11182	GSU0615	Gmet_2899
Ga0133348_112364	5	0	no	Unknown	Ga0077628_111822	GSU1228	Gmet_1744
Ga0133348_112365	4	0	no	Extracellular	Ga0077628_111822	GSU1228	Gmet_1744
Ga0133348_11693	7	0	no	Unknown	Ga0077628_11183	GSU0616	Gmet_2898
Ga0133348_11695	4	0	no	Extracellular	Ga0077628_11185	GSU0618	Gmet_2896
Ga0133348_112567	3	0	no	Periplasmic	Ga0077628_112014	GSU1024	Gmet_2902
Ga0133348_112937	5	0	no	Periplasmic	Ga0077628_112333	GSU2801	Gmet_0679
Ga0133348_112940	6	0	no	Extracellular	Ga0077628_112336	GSU2808	no hit
Ga0133348_112943	2	0	no	Periplasmic	Ga0077628_112341	GSU2813	Gmet_3091
Ga0133348_11754	12	0	no	Extracellular	Ga0077628_11240	GSU0670	Gmet_2839
Ga0133348_113013	7	0	no	Extracellular	Ga0077628_112408	no hit	Gmet_1197
Ga0133348_113014	4	0	no	Extracellular	Ga0077628_112409	GSU2887	Gmet_0600
Ga0133348_113015	21	0	no	Extracellular	Ga0077628_112409	GSU2887	Gmet_0598
Ga0133348_113026	14	0	no	Unknown	Ga0077628_112420	GSU2898	Gmet_0581
Ga0133348_113027	21	0	no	Extracellular	Ga0077628_112420	GSU2898	Gmet_0581
Ga0133348_113028	23	0	no	Extracellular	Ga0077628_112421	GSU2899	Gmet_0580
Ga0133348_113042	14	0	no	Unknown	Ga0077628_112434	GSU2912	Gmet_0558
Ga0133348_113043	12	0	no	Extracellular	Ga0077628_112434	GSU2912	Gmet_0558
Ga0133348_113044	4	0	no	Extracellular	Ga0077628_112435	GSU2913	Gmet_0557
Ga0133348_113058	2	0	no	Unknown	Ga0077628_112449	GSU2927	Gmet_0543
Ga0133348_113061	4	0	no	Unknown	Ga0077628_112452	GSU2930	Gmet_0541
Ga0133348_113066	10	0	no	Unknown	Ga0077628_112456	GSU2934	Gmet_0537
Ga0133348_113067	1	0	no	Periplasmic	Ga0077628_112457	GSU2935	Gmet_0536
Ga0133348_113068	9	0	no	Extracellular	Ga0077628_112457	GSU2935	Gmet_0536
Ga0133348_113070	5	0	no	Periplasmic	Ga0077628_112459	GSU2937	Gmet_0534
Ga0133348_113275	10	0	no	Extracellular	Ga0077628_112642	GSU3137	Gmet_0170
Ga0133348_113292	4	0	no	Periplasmic	Ga0077628_112657	GSU3154	Gmet_0294
Ga0133348_113293	4	0	no	Periplasmic	Ga0077628_112658	GSU3155	no hit
Ga0133348_113383	7	0	no	CytoplasmicMembrane	Ga0077628_112739	GSU3259	Gmet_3174
Ga0133348_113537	3	0	no	Unknown	Ga0077628_112875	GSU0105	no hit
Ga0133348_113577	4	0	no	Unknown	Ga0077628_112912	GSU0068	Gmet_3518
Ga0133348_11790	5	0	no	Extracellular	Ga0077628_11292	GSU0701	no hit
Ga0133348_11791	32	0	no	Extracellular	Ga0077628_11294	GSU0702	Gmet_0571
Ga0133348_11792	2	0	no	Unknown	Ga0077628_11294	GSU0702	Gmet_0571
Ga0133348_11125	1	0	no	Periplasmic	Ga0077628_113092	GSU3334	no hit
Ga0133348_11127	2	0	no	Extracellular	Ga0077628_113094	GSU3332	Gmet_0121
Ga0133348_11178	1	0	no	CytoplasmicMembrane	Ga0077628_113144	GSU0222	Gmet_0252
Ga0133348_11226	9	0	no	CytoplasmicMembrane	Ga0077628_113187	GSU0274	no hit
Ga0133348_11338	7	0	no	Periplasmic	Ga0077628_113302	GSU0357	no hit
Ga0133348_11344	2	0	no	Periplasmic	Ga0077628_113309	GSU0364	Gmet_2902
Ga0133348_11345	2	0	no	Periplasmic	Ga0077628_113310	GSU0365	Gmet_3165
Ga0133348_11833	1	0	no	Unknown	Ga0077628_11333	GSU0746	Gmet_2626
Ga0133348_11856	8	0	no	Unknown	Ga0077628_11352, Ga0077628_11356, Ga0077628_123	GSU2732	Gmet_0912
Ga0133348_11860	8	0	no	Unknown	Ga0077628_11352, Ga0077628_11356, Ga0077628_123	GSU2732	Gmet_0912
Ga0133348_11857	12	0	no	Extracellular	Ga0077628_11353	GSU2737	no hit
Ga0133348_11861	12	0	no	Extracellular	Ga0077628_11357, Ga0077628_124, Ga0077628_11353	GSU2737	Gmet_0913
Ga0133348_11463	2	0	no	Periplasmic	Ga0077628_1140	GSU0466	Gmet_3091
Ga0133348_11946	12	0	no	Periplasmic	Ga0077628_11433	GSU2645	Gmet_0825
Ga0133348_11948	5	0	no	Unknown	Ga0077628_11435	GSU2643	Gmet_0827
Ga0133348_11949	6	0	no	Extracellular	Ga0077628_11436	GSU2642	Gmet_0828
Ga0133348_111100	1	0	no	Extracellular	Ga0077628_11570	GSU2513	Gmet_1088
Ga0133348_111108	6	0	no	Extracellular	Ga0077628_11578	GSU2504	no hit
Ga0133348_111109	6	0	no	Extracellular	Ga0077628_11579	GSU2503	no hit
Ga0133348_111111	6	0	no	Periplasmic	Ga0077628_11582	GSU2501	no hit
Ga0133348_111117	9	0	no	Unknown	Ga0077628_11588	GSU2495	no hit
Ga0133348_111118	12	0	no	Unknown	Ga0077628_11588	GSU2495	no hit
Ga0133348_111119	16	0	no	Periplasmic	Ga0077628_11589	GSU2494	Gmet_2899
Ga0133348_111187	1	0	no	Extracellular	Ga0077628_11641	GSU2432	no hit
Ga0133348_111214	10	0	no	Periplasmic	Ga0077628_11668	GSU3137	Gmet_0170
Ga0133348_11557	2	0	no	CytoplasmicMembrane	Ga0077628_1170	no hit	no hit
Ga0133348_111292	1	0	no	Unknown	Ga0077628_11729	GSU2299	no hit
Ga0133348_111293	6	0	no	Periplasmic	Ga0077628_11729	GSU2299	no hit
Ga0133348_111300	6	0	no	Unknown	Ga0077628_11734	GSU2294	no hit
Ga0133348_111384	5	0	no	Unknown	Ga0077628_11811	GSU2210	Gmet_2301
Ga0133348_111385	21	0	no	Periplasmic	Ga0077628_11811	GSU2210	Gmet_2301
Ga0133348_111390	8	0	no	Unknown	Ga0077628_11816	GSU2201	Gmet_3088
Ga0133348_111435	8	0	no	Extracellular	Ga0077628_11875	GSU2076	Gmet_0930
Ga0133348_111526	12	0	no	Periplasmic	Ga0077628_11955	GSU1996	Gmet_2048
Ga0133348_111829	1	0	no	Unknown	no hit	GSU1740	no hit
Ga0133348_112213	1	0	no	Unknown	no hit	no hit	no hit
Ga0133348_112778	1	0	no	Unknown	no hit	no hit	no hit
Ga0133348_113088	1	0	no	Unknown	no hit	no hit	no hit
Ga0133348_113599	1	0	no	periplasmic	no hit	GSU3428	no hit
Ga0133348_11490	1	0	no	Periplasmic	no hits	no hit	no hit

## Sheet: Suppl Table S2B
Supplementary Table S2B. Homologs for genes from Geobacter sulfurreducens that code for proteins implicated in extracellular electron transfer
Homolog in PCA	Gene name	Homolog in SD-2	Homolog in GSS01	Homolog in GS-15
GSU2642-GSU2645	extABCD	Ga0133348_11946-11949	Ga0077628_11433-11436	Gmet_0825-0828
GSU2936-GSU2940	extHIJKL	Ga0133348_113069-113073	Ga0077628_112458-112462	Gmet_0531-0535
GSU2731-GSU2739	omcBC complex	Ga0133348_11855-11861	Ga0077628_11351-11357	Gmet_0908-0913
GSU3259	imcH	Ga0133348_113383	Ga0077628_112739	Gmet_3174
GSU0274	cbcL	Ga0133348_11226	Ga0077628_113187	Gmet_0100
GSU2504	omcS	Ga0133348_111108	Ga0077628_11578	No hit
GSU2076	omcZ	Ga0133348_111435	Ga0077628_11875	Gmet_0930
GSU0618	omcE	Ga0133348_11695	Ga0077628_11185	Gmet_2896
GSU1496	pilA-N	Ga0133348_112105	Ga0077628_111580	Gmet_1399
GSU0612	ppcA	Ga0133348_11688	Ga0077628_11179	Gmet_2902
GSU1394	ompB	Ga0133348_112215	Ga0077628_111679	Gmet_2163
GSU2657	ompC	No hit	No hit	Gmet_2165
GSU1501	xapD	Ga0133348_112101	Ga0077628_111576	Gmet_1403
GSU1704	esnA	Ga0133348_111888	Ga0077628_111374	Gmet_1641
GSU2220	esnB	Ga0133348_111374	Ga0077628_11802	Gmet_2309
GSU2222	esnC	Ga0133348_111372	Ga0077628_11800	Gmet_2311
GSU3376	esnD	Ga0133348_1182	Ga0077628_113051	Gmet_0069
GSU2913	omcP	Ga0133348_113044	Ga0077628_112435	Gmet_0557
GSU2912	omcO	No hit	Ga0077628_112434	Gmet_0558
GSU1786		Ga0133348_111778	Ga0077628_111187	Gmet_1867
GSU1787		Ga0133348_111777	Ga0077628_111186	Gmet_1868
GSU2505		Ga0133348_111106	Ga0077628_11576	No hit
GSU3361		Ga0133348_1198	Ga0077628_113067	Gmet_0053
GSU1984		Ga0133348_111539	Ga0077628_11966	Gmet_2029
