# Supplementary material for: Characterization of the genome fromGeobacter anodireducens, a strain with enhanced current production in bioelectrochemical systems
Source: Royal Society of Chemistry journal article supplement (doi:10.1039/c9ra02343g), 2019-01-01
Supplement: c9ra02343g2.xlsx [file c9ra02343g2.xlsx]

## Sheet: AbundanceFuncCateGenes71343_11-
Supplementary Table S3. DNA replication, recombination and repair genes identified in the Geobacter anodireducens genome. Highlighted cells represent duplicated genes that are present in tandem.
Locus Tag	Gene Product Name
Ga0133348_111	chromosomal replication initiator protein DnaA
Ga0133348_111067	DNA recombination-mediator protein A
Ga0133348_111068	DNA topoisomerase I
Ga0133348_11135	Excinuclease ABC subunit A
Ga0133348_111363	DNA polymerase III, delta prime subunit
Ga0133348_111388	DNA polymerase III, delta subunit
Ga0133348_111416	Restriction endonuclease type II-like
Ga0133348_111441	RNase HI
Ga0133348_111445	Recombination protein MgsA
Ga0133348_111448	DNA replication and repair protein RecN	recN
Ga0133348_111449	DNA replication and repair protein RecN	recN
Ga0133348_111450	DNA replication and repair protein RecN
Ga0133348_111455	Putative modulator of DNA gyrase	pmbA
Ga0133348_111456	Putative modulator of DNA gyrase	pmbA
Ga0133348_111520	DNA mismatch repair protein MutL
Ga0133348_11153	ATP-dependent RNA helicase DbpA
Ga0133348_111713	ATP-dependent helicase HrpB
Ga0133348_111720	condensin subunit ScpA
Ga0133348_111730	DNA mismatch repair protein MutS	mutS
Ga0133348_111731	DNA mismatch repair protein MutS	mutS
Ga0133348_111734	tyrosine recombinase XerD subunit
Ga0133348_111800	Exodeoxyribonuclease VII large subunit
Ga0133348_111801	Exodeoxyribonuclease VII small subunit
Ga0133348_111821	integration host factor subunit beta
Ga0133348_11183	DNA (cytosine-5)-methyltransferase 1/tRNA (cytosine38-C5)-methyltransferase
Ga0133348_111850	exonuclease SbcC
Ga0133348_111875	ATP-dependent DNA helicase RecG
Ga0133348_111876	Eco57I restriction-modification methylase
Ga0133348_111877	Helicase, C-terminal
Ga0133348_111881	Integrase
Ga0133348_111979	DNA polymerase-4
Ga0133348_112	DNA polymerase III, beta subunit
Ga0133348_1120	transcription-repair coupling factor
Ga0133348_112049	DNA replication protein DnaC
Ga0133348_112059	Exodeoxyribonuclease III
Ga0133348_112065	DNA helicase/exodeoxyribonuclease V, alpha subunit
Ga0133348_112066	Restriction endonuclease type II-like
Ga0133348_112067	UvrD-like helicase C-terminal domain-containing protein
Ga0133348_112068	exodeoxyribonuclease V, beta subunit
Ga0133348_112069	DNA helicase/exodeoxyribonuclease V, gamma subunit
Ga0133348_112077	5'-nucleotidase /3'-nucleotidase /exopolyphosphatase
Ga0133348_112080	integration host factor subunit alpha
Ga0133348_112156	endonuclease-3
Ga0133348_112184	DNA repair exonuclease SbcCD nuclease subunit
Ga0133348_112190	Site-specific recombinase XerD
Ga0133348_112225	CRISPR-associated helicase, Cas3 family
Ga0133348_112248	Helicase conserved C-terminal domain-containing protein
Ga0133348_11227	Integrase
Ga0133348_112279	ATP-dependent DNA helicase RecG
Ga0133348_11235	type I restriction enzyme, R subunit
Ga0133348_112374	hypothetical protein
Ga0133348_112393	Endonuclease YncB, thermonuclease family
Ga0133348_112416	methylated-DNA-[protein]-cysteine S-methyltransferase
Ga0133348_112458	condensin subunit Smc
Ga0133348_112459	RecF/RecN/SMC N terminal domain-containing protein
Ga0133348_112463	DNA polymerase
Ga0133348_112515	regulatory inactivation of DnaA Hda protein
Ga0133348_112516	Holliday junction DNA helicase subunit RuvB
Ga0133348_112517	Holliday junction DNA helicase subunit RuvA
Ga0133348_112518	Holliday junction endonuclease RuvC
Ga0133348_11255	ATP-dependent exoDNAse (exonuclease V) beta subunit (contains helicase and exonuclease domains)
Ga0133348_112578	DNA-nicking endonuclease, Smr domain
Ga0133348_11260	DNA repair protein RadA/Sms
Ga0133348_112606	primary replicative DNA helicase
Ga0133348_112607	DNA-(apurinic or apyrimidinic site) lyase /Formamidopyrimidine-DNA glycosylase
Ga0133348_112677	ATP-dependent RNA helicase RhlE
Ga0133348_112693	ATP-dependent DNA helicase RecQ
Ga0133348_112696	Putative modulator of DNA gyrase
Ga0133348_112700	UvrD-like helicase C-terminal domain-containing protein	uvrD
Ga0133348_112701	UvrD-like helicase C-terminal domain-containing protein	uvrD
Ga0133348_112702	UvrD/REP helicase N-terminal domain-containing protein
Ga0133348_112954	Deoxyribodipyrimidine photo-lyase type II
Ga0133348_113	DNA replication and repair protein RecF
Ga0133348_113221	putative N6-adenine-specific DNA methylase
Ga0133348_113226	DNA primase
Ga0133348_113247	DNA translocase FtsK
Ga0133348_113252	single-strand binding protein
Ga0133348_113268	bacterial nucleoid protein Hbs
Ga0133348_113358	GTP-binding protein
Ga0133348_113386	Excinuclease ABC subunit B
Ga0133348_113390	DNA helicase-2 / ATP-dependent DNA helicase PcrA
Ga0133348_113403	Excinuclease ABC subunit C
Ga0133348_11343	ATP-dependent DNA helicase DinG
Ga0133348_113493	RecA protein
Ga0133348_113511	replication restart DNA helicase PriA	priA
Ga0133348_113512	replication restart DNA helicase PriA	priA
Ga0133348_113536	chromosome segregation ATPase
Ga0133348_113545	DNA replication and repair protein RecR
Ga0133348_113547	DNA polymerase III, tau subunit
Ga0133348_113548	DNA polymerase-3 subunit gamma/tau
Ga0133348_113584	methylated-DNA-[protein]-cysteine S-methyltransferase
Ga0133348_11368	DNA replication and repair protein RadC
Ga0133348_114	DNA gyrase subunit B
Ga0133348_11414	Site-specific DNA recombinase
Ga0133348_11428	T/G mismatch-specific endonuclease
Ga0133348_11429	DNA (cytosine-5)-methyltransferase 1
Ga0133348_1146	ATP-dependent DNA helicase PcrA
Ga0133348_11488	Site-specific recombinase XerD
Ga0133348_11491	DNA breaking-rejoining enzyme, catalytic core
Ga0133348_11492	putative endonuclease
Ga0133348_11498	N-6 DNA Methylase
Ga0133348_115	DNA gyrase subunit A
Ga0133348_11501	DNA (cytosine-5)-methyltransferase 1
Ga0133348_11502	Site-specific DNA recombinase
Ga0133348_11506	single-strand DNA-binding protein
Ga0133348_11514	TraM recognition site of TraD and TraG
Ga0133348_11520	DNA polymerase-4
Ga0133348_11529	exodeoxyribonuclease V alpha subunit
Ga0133348_11560	Superfamily II DNA and RNA helicase
Ga0133348_11561	tyrosine recombinase XerD subunit
Ga0133348_11596	ATP-dependent RNA helicase RhlB
Ga0133348_11603	Endonuclease IV
Ga0133348_11616	5'-3' exonuclease
Ga0133348_11617	DNA polymerase I	polA
Ga0133348_11618	DNA polymerase family A	polA
Ga0133348_11623	DNA mismatch repair protein MutS2
Ga0133348_11624	Smr protein/MutS2
Ga0133348_11639	DNA-3-methyladenine glycosylase I
Ga0133348_11648	DNA replication and repair protein RecO
Ga0133348_11724	RNase HII
Ga0133348_11725	putative endonuclease
Ga0133348_11842	excinuclease ABC, A subunit	uvrA
Ga0133348_11843	excinuclease ABC, A subunit	uvrA
Ga0133348_11977	single-stranded-DNA-specific exonuclease	recJ
Ga0133348_11978	single-stranded-DNA-specific exonuclease RecJ	recJ
Ga0133348_12115	DNA primase
Ga0133348_12121	Type III restriction enzyme, res subunit
Ga0133348_1217	integration host factor subunit alpha
Ga0133348_1220	DNA polymerase-3 subunit epsilon
Ga0133348_1226	TraM recognition site of TraD and TraG
Ga0133348_1235	chromosome partitioning protein
Ga0133348_1247	conjugal transfer ATP-binding protein TraC
Ga0133348_127	Nucleotidyltransferase/DNA polymerase involved in DNA repair
Ga0133348_1288	Site-specific DNA recombinase
Ga0133348_1297	UvrD-like helicase C-terminal domain-containing protein
Ga0133348_111804	dnaJ domain protein
Ga0133348_1117	dnaJ domain protein
Ga0133348_1138	dnaJ domain protein
Ga0133348_11288	dnaJ domain protein
Ga0133348_11541	dnaJ domain protein
Ga0133348_111208	DisA checkpoint controller
Ga0133348_111748	DisA checkpoint controller
Ga0133348_112729	DisA checkpoint controller
