# Supplementary material for: Characterization of the genome fromGeobacter anodireducens, a strain with enhanced current production in bioelectrochemical systems
Source: Royal Society of Chemistry journal article supplement (doi:10.1039/c9ra02343g), 2019-01-01
Supplement: c9ra02343g3.xlsx [file c9ra02343g3.xlsx]

## Sheet: Sheet1
Supplementary Table S4. Annotation of genes coding for proteins in the plasmid found in Geobacter anodireducens SD-1
Locus tag	Annotation	Abbreviation	Main role
A2G06_16560	chromosome partitioning protein	parJ	Cell division
A2G06_16645	chromosome segregation protein ParM	parM	Cell division
A2G06_16525	lytic transglycosylase domain-containing protein		Cell envelope
A2G06_16950	Cobalamin biosynthesis protein CobT VWA domain-containing protein		Cobalamin biosynthesis
A2G06_16970	cobaltochelatase CobS		Cobalamin biosynthesis
A2G06_16500	conjugal transfer protein TraH		Conjugation
A2G06_16505	conjugal transfer protein TraF		Conjugation
A2G06_16515	conjugal transfer protein TraG		Conjugation
A2G06_16590	TraL protein	traL	Conjugation
A2G06_16595	conjugal transfer pilus assembly protein TraE		Conjugation
A2G06_16600	traK protein		Conjugation
A2G06_16605	TraB pilus assembly family protein		Conjugation
A2G06_16610	TraB pilus assembly family protein		Conjugation
A2G06_16615	TraV family lipoprotein		Conjugation
A2G06_16620	conjugal transfer protein		Conjugation
A2G06_16640	protein TraN		Conjugation
A2G06_16655	conjugal transfer protein TraU	traU	Conjugation
A2G06_16660	conjugal transfer protein TrbC		Conjugation
A2G06_16680	signal peptidase I/conjugal transfer pilin signal peptidase TrbI		Conjugation
A2G06_16695	conjugal transfer protein TraG		Conjugation
A2G06_16700	conjugal transfer protein TraG		Conjugation
A2G06_16635	3'(2'),5'-bisphosphate nucleotidase	CysQ	DNA replication and repair
A2G06_16730	DNA-binding WGR domain protein		DNA replication and repair
A2G06_16755	DNA/RNA non-specific endonuclease		DNA replication and repair
A2G06_16845	recombinase family protein		DNA replication and repair
A2G06_16890	ATP-dependent helicase		DNA replication and repair
A2G06_16900	Type I restriction-modification system, DNA methylase subunit		DNA replication and repair
A2G06_16925	DNA repair protein RadC		DNA replication and repair
A2G06_16965	WGR domain-containing protein, polyA polymerase like		DNA replication and repair
A2G06_16975	DNA primase		DNA replication and repair
A2G06_16995	CRISPR-associated exonuclease Cas4		DNA replication and repair
A2G06_17005	type III restriction endonuclease subunit R		DNA replication and repair
A2G06_16415	DNA polymerase IV		DNA replication and repair
A2G06_16480	DNA polymerase III subunit epsilon		DNA replication and repair
A2G06_16490	endonuclease MutS2		DNA replication and repair
A2G06_16510	metal-dependent phosphohydrolase		DNA replication and repair
A2G06_16555	DNA polymerase III subunit alpha		DNA replication and repair
A2G06_16570	Initiator Replication protein		DNA replication and repair
A2G06_16720	hypothetical protein		Hypothetical protein
A2G06_16520	nickel-type superoxide dismutase maturation protease		Oxidative stress
A2G06_16580	thiol:disulfide interchange protein DsbC	dsbC	Oxidative stress
A2G06_16735	O Protein-disulfide isomerase		Oxidative stress
A2G06_16460	integration host factor subunit alpha		Phage
A2G06_16820	integration host factor subunit alpha		Phage integration
A2G06_16470	Outer membrane cobalamin receptor protein		Porin
A2G06_16575	Outer membrane protein OmpA	ompA	Porin like protein
A2G06_16400	ImmA/IrrE family metallo-endopeptidase		Protein degradation
A2G06_16715	M23 family metallopeptidase		Protein degradation
A2G06_16465	PDZ domain protein/protease family protein		Protein degration
A2G06_16440	sensor histidine kinase		Signal transduction
A2G06_16905	HDOD domain-containing protein		Signal transduction
A2G06_16430	SOS response associated peptidase		SOS response
A2G06_16725	LexA-binding, inner membrane-associated putative hydrolase	ydjM	SOS response
A2G06_16395	helix-turn-helix transcriptional regulator		Transcriptional regulation
A2G06_16425	transcriptional repressor lexA		Transcriptional regulation
A2G06_16435	sigma-54 dependent Fis family transcriptional regulator		Transcriptional regulation
A2G06_16475	copG transcriptional regulator		Transcriptional regulation
A2G06_16530	Bacteriophage CI repressor helix-turn-helix domain-containing protein		Transcriptional regulation
A2G06_16535	DNA-binding transcriptional response regulator, NtrC family		Transcriptional regulation
A2G06_16540	RNA polymerase sigma factor, region 3/4		Transcriptional regulation
A2G06_16565	CopG family transcriptional regulator		Transcriptional regulation
A2G06_16665	transcriptional regulator		Transcriptional regulation
A2G06_16805	MucR family transcriptional regulator		Transcriptional regulation
A2G06_16445	ABC transporter substrate-binding protein		Transport and binding proteins
A2G06_16705	IS3 family transposase		Transposons
A2G06_16710	transposase		Transposons
A2G06_17010	IS200/IS605 family element transposase accessory protein TnpB		Transposons
A2G06_17015	IS200/IS605 family element transposase accessory protein TnpB		Transposons
A2G06_16405	hypothetical protein		Hypothetical protein
A2G06_16410	hypothetical protein		Hypothetical protein
A2G06_16420	hypothetical protein		Hypothetical protein
A2G06_16450	tonB dependent receptor		Transport and binding proteins
A2G06_16455	isoprenylcysteine carboxylmethyltransferase family protein		Protein modification and repair
A2G06_16485	hypothetical protein		Hypothetical protein
A2G06_16495	hypothetical protein
A2G06_16545	hypothetical protein		Hypothetical protein
A2G06_16550	Actin-like ATPase domain		Unknown function
A2G06_16585	hypothetical protein		Hypothetical protein
A2G06_16625	hypothetical protein		Hypothetical protein
A2G06_16630	hypothetical protein		Hypothetical protein
A2G06_16650	hypothetical protein		Hypothetical protein
A2G06_16670	hypothetical protein		Hypothetical protein
A2G06_16675	hypothetical protein		Hypothetical protein
A2G06_16685	hypothetical protein		Hypothetical protein
A2G06_16690	hypothetical protein		Hypothetical protein
A2G06_16740	SH3 domain-containing protein		Unknown function
A2G06_16745	hypothetical protein		Hypothetical protein
A2G06_16750	hypothetical protein		Hypothetical protein
A2G06_16760	hypothetical protein		Hypothetical protein
A2G06_16765	hypothetical protein		Hypothetical protein
A2G06_16770	hypothetical protein		Hypothetical protein
A2G06_16775	hypothetical protein		Hypothetical protein
A2G06_16780	hypothetical protein		Hypothetical protein
A2G06_16785	ATP-binding protein		Unknown function
A2G06_16790	ATP-binding protein		Unknown function
A2G06_16795	hypothetical protein		Hypothetical protein
A2G06_16800	hypothetical protein		Hypothetical protein
A2G06_16810	hypothetical protein		Hypothetical protein
A2G06_16815	hypothetical protein		Hypothetical protein
A2G06_16825	hypothetical protein		Hypothetical protein
A2G06_16830	hypothetical protein		Hypothetical protein
A2G06_16835	DUF551 domain-containing protein		Unknown function
A2G06_16840	hypothetical protein		Hypothetical protein
A2G06_16850	hypothetical protein		Hypothetical protein
A2G06_16855	hypothetical protein		Hypothetical protein
A2G06_16860	hypothetical protein		Hypothetical protein
A2G06_16865	hypothetical protein		Hypothetical protein
A2G06_16870	hypothetical protein		Hypothetical protein
A2G06_16875	hypothetical protein		Hypothetical protein
A2G06_16880	hypothetical protein		Hypothetical protein
A2G06_16885	hypothetical protein		Hypothetical protein
A2G06_16895	hypothetical protein		Hypothetical protein
A2G06_16910	hypothetical protein		Hypothetical protein
A2G06_16915	hypothetical protein		Hypothetical protein
A2G06_16920	hypothetical protein		Hypothetical protein
A2G06_16930	hypothetical protein		Hypothetical protein
A2G06_16935	hypothetical protein		Hypothetical protein
A2G06_16940	hypothetical protein		Hypothetical protein
A2G06_16945	hypothetical protein		Hypothetical protein
A2G06_16955	hypothetical protein		Hypothetical protein
A2G06_16960	DUF3150 domain-containing protein		Unknown function
A2G06_16980	TSCPD domain-containing protein		Unknown function
A2G06_16985	hypothetical protein		Hypothetical protein
A2G06_16990	hypothetical protein		Hypothetical protein
A2G06_17000	hypothetical protein		Hypothetical protein
A2G06_17020	hypothetical protein		Hypothetical protein
A2G06_17025	hypothetical protein		Hypothetical protein
A2G06_17030	hypothetical protein		Hypothetical protein
A2G06_17035	hypothetical protein		Hypothetical protein
